# Supplementary material for: Room temperature synthesis of reduced TiO2and its application as a support for catalytic hydrogenation
Source: Royal Society of Chemistry journal article supplement (doi:10.1039/c6ra26667c), 2017-01-01
Supplement: c6ra26667c1.pdf [file c6ra26667c1.pdf]

## SUPPORTING INFORMATION

# Room temperature synthesis of reduced TiO<sub>2</sub> and its application as support for catalytic hydrogenation

Miao Zhang,<sup>#ab</sup> Qijun Pei,<sup>#a,b</sup> Weidong Chen,<sup>ab</sup> Lin Liu,<sup>\*a</sup> Teng He<sup>\*a</sup> and Ping Chen<sup>ac</sup>

<sup>a</sup> *Dalian National Laboratory for Clean Energy, Dalian Institute of Chemical Physics, Chinese Academy of Sciences, Dalian 116023, China*

<sup>b</sup> *University of the Chinese Academy of Sciences, Beijing 100049, China*

<sup>c</sup> *State Key Laboratory of Catalysis, Dalian Institute of Chemical Physics, and Collaborative Innovation Center of Chemistry for Energy Materials, Dalian Institute of Chemical Physics, Chinese Academy of Sciences, Dalian 116023, China*

# These authors contributed equally to this study.

\* Corresponding author: E-mail address: liulin@dicp.ac.cn (L. Liu), heteng@dicp.ac.cn (T. He)

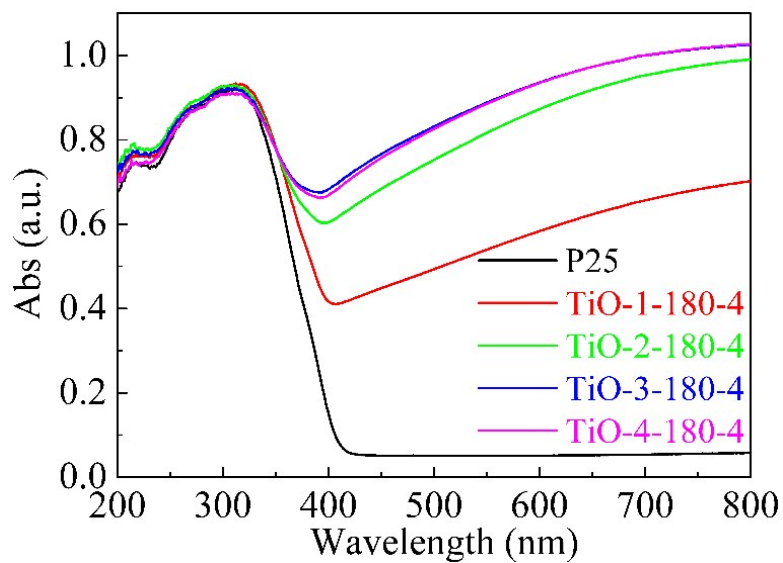

**Figure S1.** The UV-Vis diffuse reflectance spectra of P25 nanocrystals, TiO-1-180-4, TiO-2-180-4, TiO-3-180-4 and TiO-4-180-4.

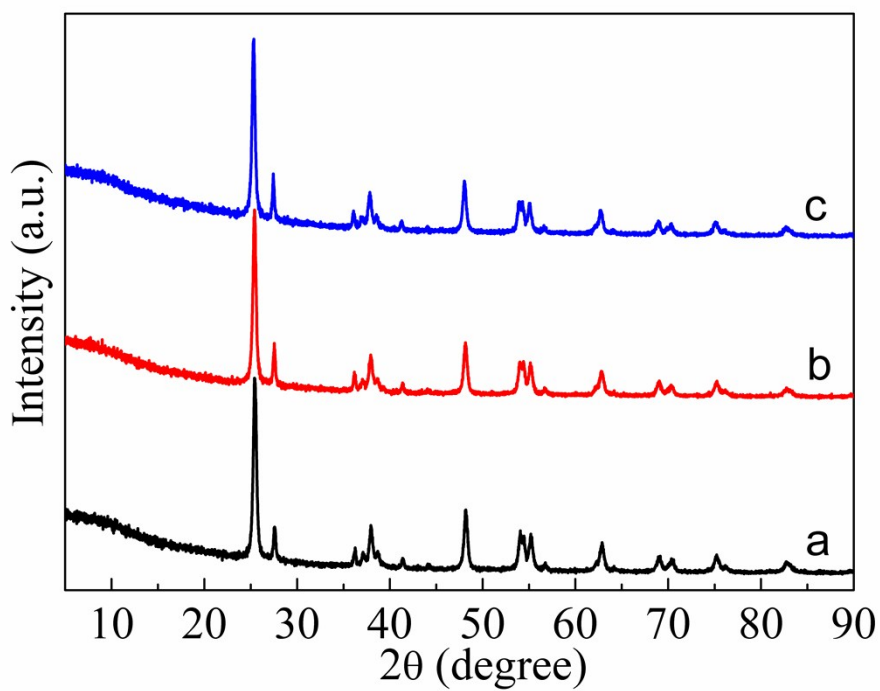

**Figure S2.** XRD patterns of P25 nanocrystals and  $\text{TiO}_{2-x}$ , (a) P25 nanocrystals; (b) TiO-1-80-0.5; (c) TiO-1-80-1.

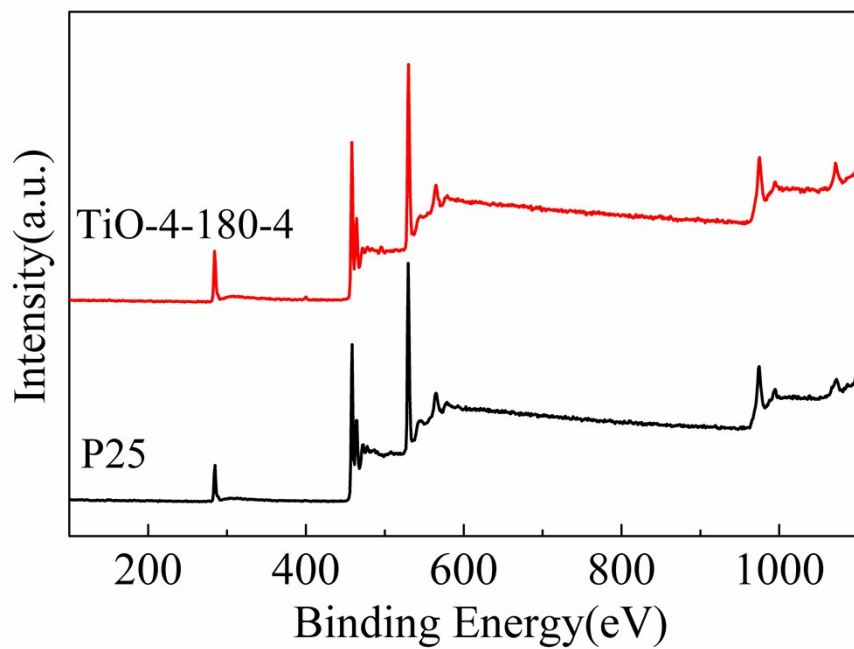

**Figure S3.** Full XPS surveys of P25 nanocrystals and TiO-4-180-4.

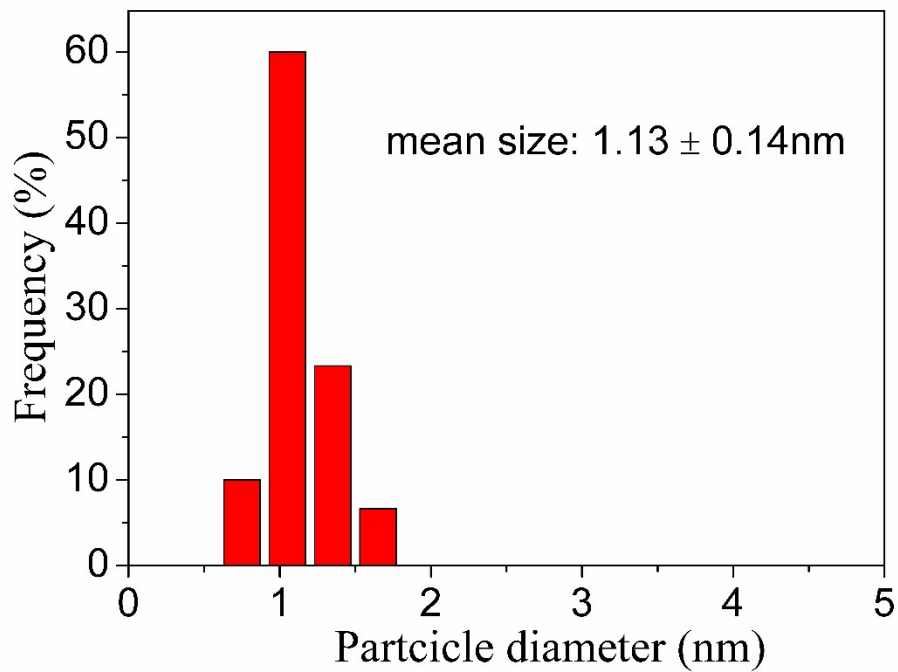

**Figure S4.** The particle size distribution of Ru in 5 wt% Ru/TiO<sub>2</sub>.

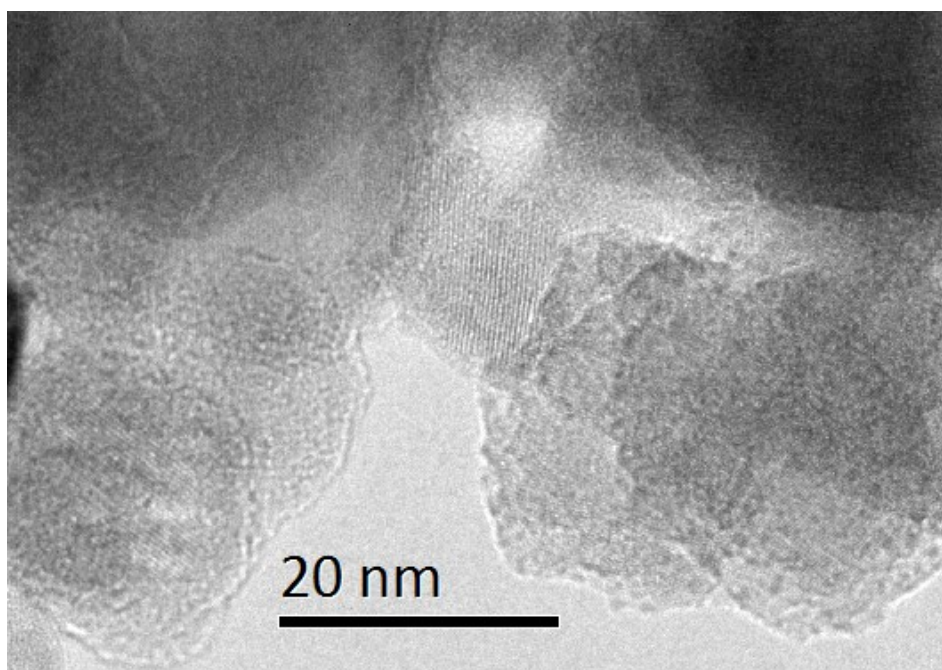

**Figure S5.** TEM image of 5 wt% Ru/TiO<sub>2-x</sub>.

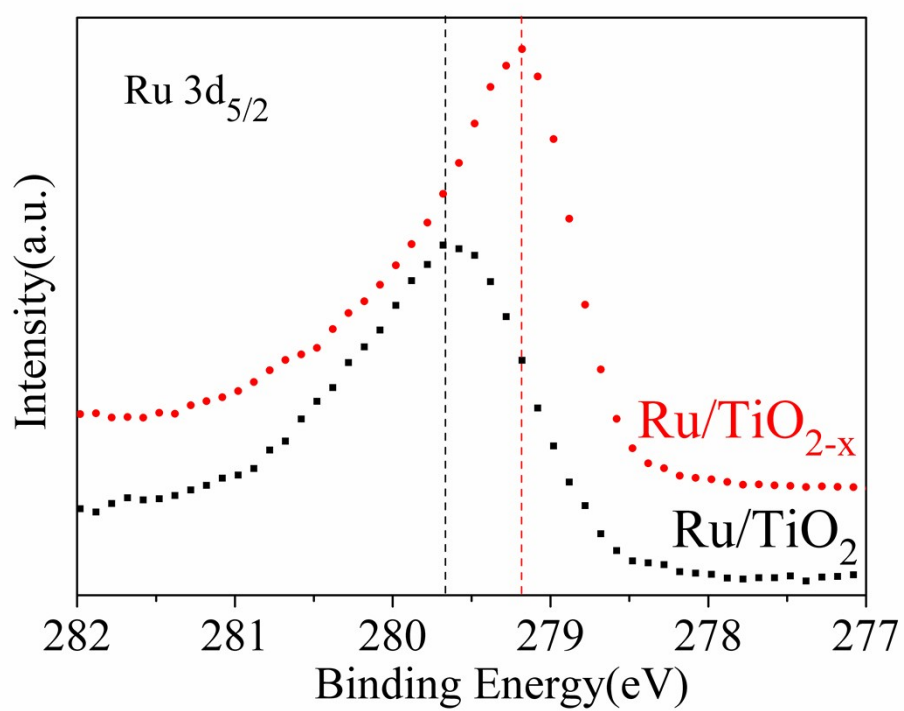

**Figure S6.** Ru 3d<sub>5/2</sub> XPS of Ru/TiO<sub>2</sub> and Ru/TiO<sub>2-x</sub> with Ar<sup>+</sup> etching.

**Table S1.** Activation energies, pre-exponential factors (A) and initial rates (at 100°C) of hydrogenation N-methylpyrrole by using 5% Ru/TiO<sub>2</sub> and 5% Ru/TiO<sub>2-x</sub>.

|                                              | 5% Ru/TiO <sub>2</sub> | 5% Ru/TiO <sub>2-x</sub> |
|----------------------------------------------|------------------------|--------------------------|
| <i>E<sub>a</sub></i> (kJ mol <sup>-1</sup> ) | 50.9                   | 50.0                     |
| <i>A</i> (10 <sup>7</sup> h <sup>-1</sup> )  | 5.41                   | 7.31                     |
| <i>r</i> (mol/(L*h))                         | 0.51                   | 0.93                     |
